# Supplementary material for: High-content analysis identified synergistic drug interactions between INK128, an mTOR inhibitor, and HDAC inhibitors in a non-small cell lung cancer cell line
Source: Springer Nature journal article supplement (doi:10.1186/s12885-024-12057-4), 2024-03-12

**A**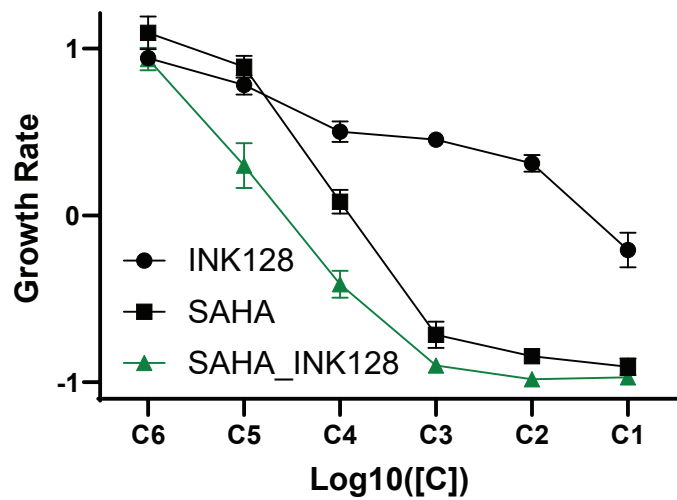**B**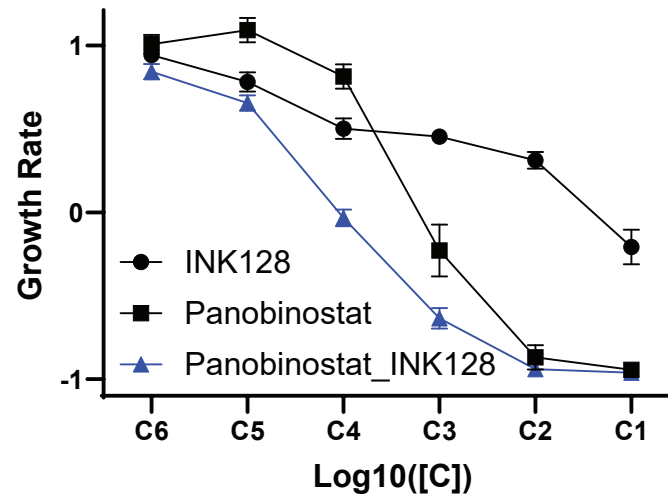**C**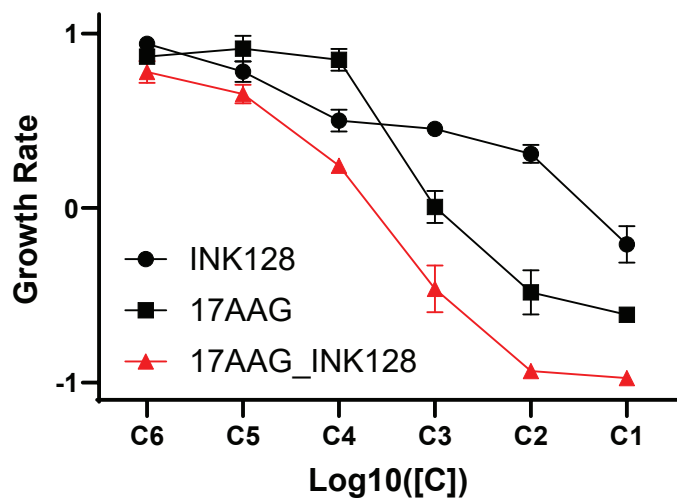**D**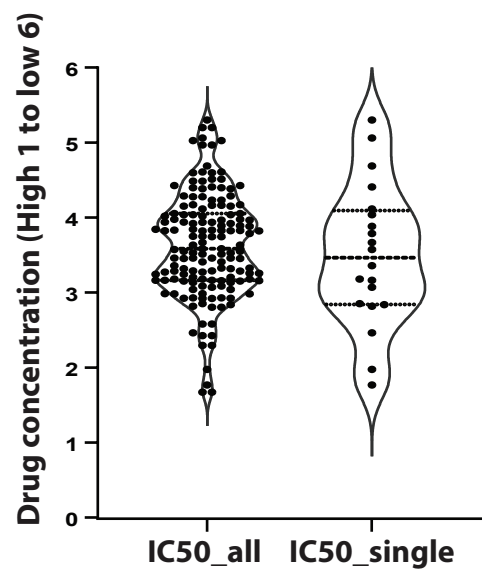

Supplement: MOESM2 [file 26846876]
